# Supplementary material
Source: MDPI journal article supplement (https://www.mdpi.com/1424-2818/15/12/1194)
Supplement: s1 [file s1]

**Supplementary Table S1:** location data, environmental parameters measured, and filtered seawater volume for coccolithophores at the investigated stations.

| station | latitude   | longitude  | bottom depth (m) | sampling depth (m) | temperature (°C) | salinity | chl- $\alpha$ ( $\mu\text{g l}^{-1}$ ) | filtered seawater volume (L) for coccolithophores |
|---------|------------|------------|------------------|--------------------|------------------|----------|----------------------------------------|---------------------------------------------------|
| 1       | 43°50.00'N | 28°40.00'E | 33               | 1                  | 16.17            | 17.00    | 11.32                                  | 0.20                                              |
| 2       | 44°00.00'N | 29°01.10'E | 48               | 1                  | 24.28            | 16.25    | 3.45                                   | 0.20                                              |
| 2       |            |            |                  | 15                 | 12.46            | 21.41    | 32.08                                  | 0.20                                              |
| 3       | 44°13.50'N | 28°46.50'E | 26               | 4                  | 19.38            | 15.50    | 12.43                                  | 0.20                                              |
| 3       |            |            |                  | 8                  | 15.87            | 17.56    | 8.99                                   | 0.20                                              |
| 4       | 44°32.60'N | 28°59.80'E | 22               | 1                  | 18.32            | 16.48    | 19.36                                  | 0.20                                              |
| 5       | 44°31.20'N | 29°37.90'E | 50               | 1                  | 23.78            | 13.55    | 8.82                                   | 0.20                                              |
| 5       |            |            |                  | 15                 | 15.26            | 16.44    | 42.60                                  | 0.20                                              |
| 6       | 44°50.30'N | 30°15.50'E | 50               | 1                  | 22.50            | 12.97    | 23.57                                  | 0.20                                              |
| 6       |            |            |                  | 7                  | 20.58            | 14.50    | 77.47                                  | 0.20                                              |
| 6       |            |            |                  | 35                 | 7.29             | 18.14    | 0.83                                   | 0.20                                              |
| 7       | 45°01.30'N | 30°12.00'E | 42               | 1                  | 22.89            | 12.73    | 11.61                                  | 0.20                                              |
| 7       |            |            |                  | 9                  | 20.42            | 13.50    | 80.47                                  | 0.20                                              |
| 7       |            |            |                  | 30                 | 7.21             | 18.09    | 0.91                                   | 0.20                                              |
| 8       | 43°34.20'N | 29°09.40'E | 68               | 1                  | 22.70            | 13.13    | 21.48                                  | 0.55                                              |
| 8       |            |            |                  | 5                  | 22.53            | 13.09    | 30.57                                  | 0.54                                              |
| 8       |            |            |                  | 15                 | 13.99            | 16.65    | 8.21                                   | 1.00                                              |
| 8       |            |            |                  | 25                 | 7.36             | 18.14    | 0.99                                   | 1.00                                              |
| 9       | 43°50.60'N | 29°38.20'E | 75               | 1                  | 20.54            | 17.16    | 5.72                                   | 0.20                                              |
| 10      | 43°59.90'N | 29°40.50'E | 67               | 1                  | 23.72            | 13.69    | 6.46                                   | 0.20                                              |
| 10      |            |            |                  | 15                 | 22.24            | 13.60    | 13.93                                  | 0.20                                              |
| 11      | 44°09.60'N | 29°39.70'E | 65               | 3                  | 21.56            | 14.19    | 13.35                                  | 0.20                                              |
| 12      | 44°27.10'N | 30°29.40'E | 85               | 4                  | 21.85            | 14.69    | 15.80                                  | 0.20                                              |
| 12      |            |            |                  | 16                 | 16.71            | 17.96    | 8.77                                   | 0.20                                              |
| 12      |            |            |                  | 45                 | 9.26             | 18.33    | 2.45                                   | 0.20                                              |
| 13      | 44°29.50'N | 30°49.50'E | 101              | 1                  | 23.88            | 15.61    | 1.17                                   | 0.20                                              |
| 13      |            |            |                  | 20                 | 22.36            | 15.82    | 3.08                                   | 0.20                                              |
| 14      | 42°17.00'N | 28°50.00'E | 1353             | 1                  | 21.11            | 18.26    | 2.76                                   | 1.00                                              |
| 14      |            |            |                  | 5                  | 21.11            | 18.26    | 2.54                                   | 1.37                                              |
| 14      |            |            |                  | 15                 | 13.62            | 18.37    | 3.55                                   | 1.88                                              |
| 14      |            |            |                  | 25                 | 12.00            | 18.42    | 2.65                                   | 2.00                                              |
| 14      |            |            |                  | 35                 | 11.00            | 18.44    | 2.60                                   | 2.00                                              |
| 15      | 42°35.00'N | 30°50.00'E | 2165             | 1                  | 20.21            | 18.32    | 1.68                                   | 0.78                                              |
| 15      |            |            |                  | 10                 | 17.19            | 18.31    | 2.48                                   | 1.00                                              |
| 15      |            |            |                  | 25                 | 10.79            | 18.44    | 2.61                                   | 1.50                                              |
| 15      |            |            |                  | 45                 | 8.50             | 18.70    | 5.76                                   | 2.00                                              |
| 16      | 42°35.40'N | 31°34.50'E | 2150             | 1                  | 21.12            | 18.27    | 1.91                                   | 0.76                                              |
| 16      |            |            |                  | 10                 | 18.49            | 18.22    | 2.17                                   | 1.00                                              |
| 16      |            |            |                  | 25                 | 11.58            | 18.42    | 2.98                                   | 0.78                                              |
| 16      |            |            |                  | 45                 | 8.75             | 18.56    | 3.13                                   | 2.00                                              |

|    |            |            |      |    |       |       |      |      |
|----|------------|------------|------|----|-------|-------|------|------|
| 17 | 42°54.00'N | 33°00.00'E | 2204 | 1  | 20.25 | 18.44 | 1.43 | 1.00 |
| 17 |            |            |      | 10 | 18.88 | 18.44 | 2.15 | 2.00 |
| 17 |            |            |      | 25 | 12.10 | 18.38 | 3.31 | 2.00 |
| 18 | 43°00.30'N | 33°49.50'E | 2205 | 1  | 22.31 | 18.89 | 1.21 | 1.00 |
| 18 |            |            |      | 10 | 19.98 | 18.33 | 1.36 | 1.45 |
| 18 |            |            |      | 20 | 13.01 | 18.48 | 2.26 | 0.61 |
| 18 |            |            |      | 35 | 10.23 | 18.53 | 2.90 | 2.00 |
| 18 |            |            |      | 50 | 8.34  | 18.76 | 6.31 | 2.00 |

---
